# Supplementary material for: Metabolic and Inflammation Variable Clusters and Prediction of Type 2 Diabetes
Source: Oxford University Press journal article supplement (doi:10.2337/diabetes.53.7.1773), 2004-07-01
Supplement: 1773-sup-db1266onlineappendix.doc [file 1773-sup-db1266onlineappendix.doc]

#### On-Line Appendix

#### DB03-1266

Hanley et al.

“Metabolic and Inflammation Variable Clusters and Prediction of Type 2 Diabetes: Factor Analysis using Directly Measured Insulin Sensitivity”

Additional Information on Subjects and Methods

Details Regarding Conducting the Factor Analysis

Principal factor analysis was conducted using the FACTOR procedure of SAS. Prior communalities were estimated using the squared multiple correlations between each variable and the other variables (PRIORS = SMC). The number of factors to be retained was based on scree plot analysis, proportion of common variance explained (>10%), and factor interpretability criteria, which have been described and recommended elsewhere [1, 2]. Briefly, scree plots were constructed by plotting the eigenvalues against the principal factors (in sequence), with factors above the break in the curve retained. In addition, we retained factors which explained more than 10% of the common variance (defined as the variance in a variable shared with the common factors) in the dataset. Finally, we evaluated final factor solutions in terms of the interpretability of the factor structure. Four criteria were assessed in this regard: (1) at least 3 variables should have significant loadings on each retained factor; (2) variables loading on a given factor should share some conceptual meaning; (3) variables loading on different factors should appear to be measuring different constructs; (4) the rotated factor pattern should have a simple structure, with most factors having high loadings for some variables and low loadings on the others. The often cited Kaiser criterion, which suggests that one should retain factors with eigenvalues >1, is more appropriate for principal components factor analysis and may be relaxed for common factor analysis, depending on the number of variables [2]. Eigenvalues for the 3 retained factors in the current study were 3.4, 0.89, and 0.72.

Varimax (orthogonal) rotation was employed to obtain a set of independent interpretable factors. The resulting factor pattern was interpreted using factor loadings of 0.4. We report both the common variance (proportion of a variance in a variable shared with the common factors) and total variance (common variance plus specific variance plus error variance) explained by the factors. These analyses were initially carried out with all non-diabetic subjects pooled. We then re-ran the analysis within strata of ethnicity (non-Hispanic Whites, African Americans, and Hispanic Americans) and gender to assess the role of these potential effect modifying variables. Coefficients of congruence (CC) [2, 3] were calculated to evaluate similarities between loadings on the same factor stratified by ethnicity or gender using the formula presented in Cureton and D’Agostino [2], who describe the application and interpretation of the coefficient in detail. CC can be interpreted in a similar fashion to correlation coefficients and will equal 1 when pairs of loadings are identical.

In addition to a 3-factor solution, we also considered 4- and 5-factor solutions for these data. These solutions were rejected due to the presence of several factors (2 in the case of the 4-factor solution, 3 in the case of the 5-factor solution) with significant loadings of only 2 variables. In addition, factors 4 and 5 each explained <10% of the common variance in the dataset.

Factor scores were calculated for each subject. These scores represent the subjects’ predicted values for each factor, and are calculated using the factor weights and the original variable values. In the calculation of factor scores, each variable entered into in the analysis and the corresponding factor weights are used, therefore variables with high loadings are the most important contributors to a factor score. However, variables with loadings <|0.40| also contribute to the calculation of the scores, which is important to keep in mind when interpreting the results of our prospective analyses between the factors and the development of diabetes at follow-up.

References

1. Meigs JB. Invited commentary: insulin resistance syndrome? Syndrome X? Multiple metabolic syndrome? A syndrome at all? Factor analysis reveals patterns in the fabric of correlated metabolic risk factors. Am J Epidemiol 152:908-11, 2000.

2. Cureton EE, D’Agostino RB. Factor Analysis: An Applied Approach. Hillside, NJ: Lawrence Erlbaum Associates, 1983

3. Meigs JB, D'Agostino RB Sr, Wilson PW, et al. Risk variable clustering in the insulin resistance syndrome. The Framingham Offspring Study. Diabetes 46:1594-600, 1997.

Appendix TABLE 1. Results of factor analysis of anthropometric, metabolic and pro-inflammation variables among non-diabetic subjects in IRAS. Analyses using the log of fasting insulin rather than Log(SI+1).

______________________________________________________________________

Variable Factor

___________________________________________

*Metabolic Inflammation Blood*

pressure

______________________________________________________________________

BMI **0.46**   **0.64** 0.16

Waist **0.62**   **0.50** 0.21

Log fasting insulin  **0.51**  0.35 0.17

Fasting glucose 0.38 0.18 0.28

2-hour glucose 0.37 0.28 0.19

Log triglyceride  **0.56**  -0.01 0.02

HDL-C **-0.57**  0.04 0.05

Systolic BP 0.03 0.16 **0.69**

Diastolic BP 0.10 0.04 **0.66**

Fibrinogen (mg/dl) -0.03 **0.59** 0.05

Log PAI-1 (ng/ml) **0.53** 0.18 0.11

Log CRP (mg/l) 0.12 **0.66** 0.11

% total variance 28.0 7.4 6.1

% cumulative total variance 28.0 35.4 41.5

______________________________________________________________________

###### Loadings  0.40 in bold type

**Appendix TABLE 2. . Multiple logistic regression analysis**

**of associations of factor scores from the baseline**

**IRAS examination (1992-1994) with risk of incident**

**diabetes at the follow-up examination (median follow-**

**up, 5.2 years), with adjustment for age, sex and smoking**

**status.**

**_________________________________________________**

Independent

Variables OR1 (95% CI)

_________________________________________________

Univariate Models

1. Metabolic factor 2.61 (2.07-3.30)§

2. Inflammation factor 1.60 (1.32-1.93)§

3. Blood pressure factor 1.48 (1.22-1.78)§

_________________________________________________

1ORs per SD difference in factor score, adjusted for age, sex

and smoking status.

‡p<0.001; §p<0.0001
